# Supplementary material for: COVID-19 and Mitochondrial Non-Coding RNAs: New Insights From Published Data
Source: Front Physiol. 2022 Feb 4;12:805005. doi: 10.3389/fphys.2021.805005 (PMC8856670; doi:10.3389/fphys.2021.805005)
Supplement: Supplementary file 1 [file Table_1.XLSX]

## Sheet: SmallRNAs STATS
Clusters	Conv_Rehab (LogFC)	Conv_Rehab (pvalue)	Conv_Rehab (padj)	Treat_Rehab (LogFC)	Treat_Rehab (pvalue)	Treat_Rehab (padj)	Treat_Conv (LogFC)	Treat_Conv (pvalue)	Treat_Conv (padj)	Sex_M_F (LogFC)	Sex_M_F (pvalue)	Sex_M_F (padj)
mtRNA_1	0.21605	0.193739	0.28491	0.707558	3.39594e-05	0.000181925	0.21605	0.193739	0.28491	0.140235	0.327964	0.4641
mtRNA_2	-0.356417	0.215462	0.304899	-0.216075	0.464578	0.611287	-0.356417	0.215462	0.304899	0.394881	0.111553	0.246072
mtRNA_4	-0.0809281	0.593602	0.64522	0.00575833	0.970496	0.973815	-0.0809281	0.593602	0.64522	0.360154	0.00582794	0.0364246
mtRNA_6	1.11556	9.02118e-09	5.84151e-08	1.06381	9.30811e-08	8.72635e-07	1.11556	9.02118e-09	5.84151e-08	-0.0130486	0.937737	0.950409
mtRNA_8	-0.763401	0.281791	0.365527	0.457143	0.529252	0.671289	-0.763401	0.281791	0.365527	-1.1355	0.0593961	0.159097
mtRNA_9	-0.660954	0.232684	0.323172	-0.162893	0.774536	0.842024	-0.660954	0.232684	0.323172	-0.269428	0.572695	0.692777
mtRNA_10	-0.752523	0.0175145	0.0355023	-0.0966824	0.766207	0.842024	-0.752523	0.0175145	0.0355023	0.538038	0.0487484	0.14062
mtRNA_12	0.115743	0.400652	0.492604	0.391106	0.00565229	0.0163047	0.115743	0.400652	0.492604	0.200944	0.0897761	0.22444
mtRNA_13	-0.657036	0.00109757	0.00269291	-0.42761	0.0384346	0.0823598	-0.657036	0.00109757	0.00269291	0.254905	0.140536	0.282644
mtRNA_15	-0.0729329	0.454227	0.532297	0.0815349	0.414958	0.565852	-0.0729329	0.454227	0.532297	0.0716937	0.391935	0.524913
mtRNA_16	-0.358757	0.0012118	0.00284015	-0.156681	0.16862	0.285852	-0.358757	0.0012118	0.00284015	0.298514	0.00177469	0.0190145
mtRNA_17	0.0159181	0.963671	0.963671	0.523516	0.141981	0.259721	0.0159181	0.963671	0.963671	-0.145389	0.611788	0.728319
mtRNA_18	0.141071	0.162478	0.243717	0.171768	0.0972406	0.187001	0.141071	0.162478	0.243717	0.10829	0.205208	0.32746
mtRNA_19	0.939881	2.36627e-05	8.45095e-05	0.881068	0.00011246	0.000527157	0.939881	2.36627e-05	8.45095e-05	0.542637	0.00447803	0.0335826
mtRNA_31	-0.926844	0.0096349	0.0206462	-0.344011	0.349285	0.523928	-0.926844	0.0096349	0.0206462	0.233286	0.449634	0.571568
mtRNA_32	-0.196398	0.0312905	0.0521508	-0.0317442	0.73443	0.842024	-0.196398	0.0312905	0.0521508	0.159729	0.0408413	0.122524
mtRNA_33	-0.132047	0.695056	0.744703	0.359299	0.298486	0.466385	-0.132047	0.695056	0.744703	0.970432	0.000817187	0.0141374
mtRNA_39	-0.366592	0.0273226	0.0487904	-0.0824308	0.628558	0.760352	-0.366592	0.0273226	0.0487904	0.193478	0.174792	0.29948
mtRNA_43	-0.357394	0.0291315	0.0508107	-0.116242	0.48892	0.632224	-0.357394	0.0291315	0.0508107	0.183219	0.189708	0.309307
mtRNA_57	-2.65075	2.99986e-11	3.74983e-10	-2.29943	1.93405e-08	2.0722e-07	-2.65075	2.99986e-11	3.74983e-10	0.93141	0.00682056	0.0365387
mtRNA_62	0.271194	0.00111307	0.00269291	0.218113	0.0105564	0.0263911	0.271194	0.00111307	0.00269291	-0.0291308	0.66926	0.772223
mtRNA_75	0.19162	0.0321268	0.0523806	0.132309	0.149452	0.261979	0.19162	0.0321268	0.0523806	-0.123717	0.103952	0.241534
mtRNA_76	0.13745	0.253519	0.339535	0.112473	0.362353	0.52914	0.13745	0.253519	0.339535	0.140248	0.163655	0.29948
mtRNA_87	0.245847	0.0223442	0.0408735	0.0997532	0.366871	0.52914	0.245847	0.0223442	0.0408735	-0.146313	0.0984782	0.238254
mtRNA_95	0.794611	0.00106409	0.00269291	0.676127	0.00659379	0.0183161	0.794611	0.00106409	0.00269291	-0.0711051	0.726041	0.789359
mtRNA_99	-1.13385	4.53018e-11	4.85377e-10	-0.934437	1.2382e-07	1.03183e-06	-1.13385	4.53018e-11	4.85377e-10	0.199363	0.175695	0.29948
mtRNA_104	-3.15537	1.4058e-09	1.1715e-08	-2.74088	2.96744e-07	2.22558e-06	-3.15537	1.4058e-09	1.1715e-08	1.08208	0.0161823	0.0606835
mtRNA_122	0.541349	3.85883e-06	1.70243e-05	0.284493	0.018136	0.0419564	0.541349	3.85883e-06	1.70243e-05	-0.147147	0.124007	0.26573
mtRNA_126	-0.307308	0.142525	0.222695	-0.204963	0.340522	0.521206	-0.307308	0.142525	0.222695	-0.0555848	0.755409	0.797967
mtRNA_130	0.611019	0.000304663	0.000878835	0.33772	0.0525574	0.109495	0.611019	0.000304663	0.000878835	-0.174175	0.169416	0.29948
mtRNA_135	-0.18775	0.203255	0.293157	-0.207263	0.171511	0.285852	-0.18775	0.203255	0.293157	0.112215	0.348332	0.474998
mtRNA_144	-3.10251	3.70619e-15	6.9491e-14	-2.37905	3.94946e-09	5.92419e-08	-3.10251	3.70619e-15	6.9491e-14	0.862291	0.0113045	0.0498726
mtRNA_154	0.101139	0.15779	0.241516	0.0307026	0.676536	0.8054	0.101139	0.15779	0.241516	-0.118686	0.0361565	0.117902
mtRNA_159	-0.0292	0.829737	0.864309	-0.0426484	0.759411	0.842024	-0.0292	0.829737	0.864309	0.232463	0.0405762	0.122524
mtRNA_164	0.0359393	0.920374	0.932811	0.59373	0.106062	0.198866	0.0359393	0.920374	0.932811	0.399018	0.188914	0.309307
mtRNA_165	0.402864	0.00016173	0.000485189	0.258352	0.0184608	0.0419564	0.402864	0.00016173	0.000485189	-0.0862556	0.317799	0.458364
mtRNA_216	-1.90818	8.2298e-18	2.05745e-16	-1.39644	8.65201e-10	1.62225e-08	-1.90818	8.2298e-18	2.05745e-16	-0.0827755	0.664791	0.772223
mtRNA_227	1.74057	1.46102e-18	5.47882e-17	1.56407	8.70118e-15	3.26294e-13	1.74057	1.46102e-18	5.47882e-17	-0.0499854	0.707126	0.789359
mtRNA_244	0.583336	3.49347e-09	2.6201e-08	0.349335	0.000569838	0.00224936	0.583336	3.49347e-09	2.6201e-08	-0.112031	0.171726	0.29948
mtRNA_268	0.691047	3.82341e-08	2.04826e-07	0.500617	0.000104238	0.000521189	0.691047	3.82341e-08	2.04826e-07	-0.245055	0.0102879	0.0482247
mtRNA_271	-0.49182	0.0214925	0.0408295	-0.636898	0.00390954	0.0122173	-0.49182	0.0214925	0.0408295	-0.435444	0.0151728	0.0606835
mtRNA_289	0.888458	3.78638e-05	0.000129081	0.688131	0.00185362	0.00662006	0.888458	3.78638e-05	0.000129081	-0.120184	0.446953	0.571568
mtRNA_299	-2.09201	3.95827e-33	2.9687e-31	-1.55712	2.91554e-18	2.18666e-16	-2.09201	3.95827e-33	2.9687e-31	0.531864	0.000398618	0.00996545
mtRNA_325	-0.547596	1.16096e-05	4.58273e-05	-0.578866	6.63526e-06	4.14703e-05	-0.547596	1.16096e-05	4.58273e-05	0.0797481	0.443225	0.571568
mtRNA_337	0.11051	0.50544	0.574363	-0.0305537	0.857884	0.89363	0.11051	0.50544	0.574363	-0.0966897	0.480754	0.600942
mtRNA_360	-0.779806	0.0217757	0.0408295	-0.616335	0.0762573	0.150508	-0.779806	0.0217757	0.0408295	1.01887	0.000371404	0.00996545
mtRNA_403	-0.344234	0.0113669	0.023681	-0.260998	0.0615986	0.124862	-0.344234	0.0113669	0.023681	-0.030904	0.777429	0.809822
mtRNA_404	0.465757	0.00272982	0.00602165	0.420523	0.00828427	0.0214248	0.465757	0.00272982	0.00602165	-0.246072	0.0348949	0.117902
mtRNA_420	0.0974625	0.31807	0.404326	-0.086379	0.390544	0.552656	0.0974625	0.31807	0.404326	-0.0442361	0.558936	0.687217
mtRNA_424	0.0225859	0.827441	0.864309	-0.130901	0.219936	0.350962	0.0225859	0.827441	0.864309	-0.0782981	0.340526	0.472953
mtRNA_427	0.113755	0.585158	0.64522	-0.115514	0.590806	0.726401	0.113755	0.585158	0.64522	-0.0393569	0.813415	0.835701
mtRNA_429	1.03097	0.000108606	0.000339394	0.669774	0.0143418	0.034698	1.03097	0.000108606	0.000339394	-0.00224787	0.990976	0.990976
mtRNA_502	0.600622	2.94734e-10	2.76313e-09	0.370619	0.000154649	0.000682277	0.600622	2.94734e-10	2.76313e-09	-0.239778	0.0012623	0.0157788
mtRNA_532	0.452743	0.0180396	0.0356044	0.457856	0.0196541	0.0433547	0.452743	0.0180396	0.0356044	-0.148681	0.292258	0.438386
mtRNA_535	0.308924	0.00130054	0.00295576	0.0749337	0.449098	0.601471	0.308924	0.00130054	0.00295576	-0.219495	0.00282028	0.0264401
mtRNA_549	0.592266	2.02043e-05	7.57661e-05	0.385479	0.00693258	0.0185694	0.592266	2.02043e-05	7.57661e-05	-0.102981	0.305491	0.449252
mtRNA_590	0.537583	0.000384098	0.00106694	0.486612	0.00168791	0.00632965	0.537583	0.000384098	0.00106694	-0.272077	0.00915375	0.0457687
mtRNA_605	-1.11299	0.408638	0.494321	-1.13892	0.408739	0.565852	-1.11299	0.408638	0.494321	0.45214	0.698373	0.789359
mtRNA_668	1.10249	8.64438e-08	4.32219e-07	0.79547	0.000167074	0.000696142	1.10249	8.64438e-08	4.32219e-07	-0.326066	0.0283653	0.101305
mtRNA_732	-2.09893	5.7912e-06	2.413e-05	-1.41844	0.00263842	0.00860356	-2.09893	5.7912e-06	2.413e-05	1.1159	0.00492544	0.0335826
mtRNA_834	-1.867	2.0508e-08	1.18315e-07	-1.47407	1.51523e-05	8.7417e-05	-1.867	2.0508e-08	1.18315e-07	0.536093	0.0577862	0.159097
mtRNA_869	0.306011	0.0299871	0.0511144	0.00702567	0.961534	0.973815	0.306011	0.0299871	0.0511144	-0.122888	0.241582	0.369768
mtRNA_951	0.580626	5.24521e-05	0.000171039	0.420288	0.00433555	0.0130067	0.580626	5.24521e-05	0.000171039	-0.201014	0.0638345	0.165089
mtRNA_1719	0.115865	0.470486	0.542869	-0.0054235	0.973815	0.973815	0.115865	0.470486	0.542869	-0.305019	0.015538	0.0606835
mtRNA_1908	-0.423721	0.132859	0.212008	-0.0805241	0.780266	0.842024	-0.423721	0.132859	0.212008	0.353957	0.137507	0.282644
mtRNA_2846	-0.20452	0.241253	0.328981	0.0458626	0.797394	0.842318	-0.20452	0.241253	0.328981	0.427689	0.00362096	0.0301746
mtRNA_4016	0.0927279	0.583486	0.64522	0.248993	0.150201	0.261979	0.0927279	0.583486	0.64522	-0.429497	0.000942496	0.0141374
mtRNA_4146	-0.150939	0.419309	0.499178	0.0519352	0.785889	0.842024	-0.150939	0.419309	0.499178	0.216341	0.148825	0.286201
mtRNA_4167	0.16354	0.282675	0.365527	0.197154	0.20661	0.336863	0.16354	0.282675	0.365527	-0.332354	0.0063345	0.0365387
mtRNA_4170	-2.43457	1.4704e-14	2.2056e-13	-1.86649	7.96179e-09	9.95224e-08	-2.43457	1.4704e-14	2.2056e-13	0.32632	0.231419	0.361592
mtRNA_4226	-0.0324781	0.844988	0.868138	0.104935	0.537031	0.671289	-0.0324781	0.844988	0.868138	-0.0426954	0.742459	0.795492
mtRNA_5189	-1.07374	6.3851e-07	2.99301e-06	-1.46463	9.23729e-11	2.30932e-09	-1.07374	6.3851e-07	2.99301e-06	-0.296782	0.106275	0.241534
mtRNA_5706	-0.78817	0.000803316	0.00215174	-1.13759	3.44978e-06	2.35212e-05	-0.78817	0.000803316	0.00215174	-0.289653	0.143206	0.282644
mtRNA_6222	-0.194823	0.35578	0.444726	-0.0760825	0.725055	0.842024	-0.194823	0.35578	0.444726	-0.0607093	0.72621	0.789359
mtRNA_6814	-2.45342	9.34641e-09	5.84151e-08	-1.31845	0.00212226	0.00723499	-2.45342	9.34641e-09	5.84151e-08	1.49885	4.18e-05	0.0031317
